# Supplementary material for: Pediatric Application of Coding and Valuation Systems
Source: Oxford University Press journal article supplement (doi:10.1542/peds.2019-2498), 2019-09-30
Supplement: peds_20192498supplementarydata.pdf [file peds_20192498supplementarydata.pdf]

## Supplemental Information

### NDC EXAMPLE

Infanrix (diphtheria and tetanus toxoids and acellular pertussis vaccine) is as follows: 10 single-dose vials in 1 carton (0.5 mL per vial).

### FDA NDC CODE

Typical FDA NDC formatting to an electronic claim requires transfer to an 11-digit 5-4-2 format, for example, 5816081011, in which 58160 is the labeler code, 810 is the product code, and 11 is the package code. For this FDA NDC, one would insert a leading 0 on the 3-digit product code (preceding 810) to create the electronically compatible 5-4-2 format, as follows: 58160081011, in

which 58160 is the labeler code, 0810 is the product code (formatted with a leading zero for an electronic claim), and 11 is the package code.

Additional NDC claim-formatting concepts include the following:

- prefacing the 11-digit NDC code with the N4 qualifier (which indicates use of an NDC code);
- a dosage unit of measurement, which may include
  - F2 (IU per vial or micrograms)
  - GR (grams)
  - ME (milligrams)
  - ML (milliliter) or
  - UN (unit);
- number of NDC units dispensed; and
- a typical electronic claim would sequentially format the NDC entry as follows: N4 qualifier, NDC code, 1 space, dosage unit of measurement, and quantity dispensed.

Payers vary in their approach to NDC claim formatting, but for the vaccine mentioned above, a payer that requests a number of dispensed units as the actual administered dose would format an electronic claim NDC as N458160081011 ML0.5.
